# Supplementary material for: Long-Term Outcomes of Patients with Acute Cholecystitis after Successful Percutaneous Cholecystostomy Treatment and the Risk Factors for Recurrence: A Decade Experience at a Single Center
Source: PLoS One. 2016 Jan 28;11(1):e0148017. doi: 10.1371/journal.pone.0148017 (PMC4731150; doi:10.1371/journal.pone.0148017)
Supplement: S1 Dataset — (XLSX) [file pone.0148017.s001.xlsx]

## Sheet: WorkingSheet1
		Comorbidity									Clinical symptoms and signs on presentation at emergency department										Diagnostic tools		Findings on ultrasonography or computed tomography		Severity grade by Tokyo guidelines					Duration after presentation at emergency department						Events occurring within two months of PCT removal			Events occurring within one year of PCT removal			Culture result
Age	Male	Diabetes mellitus	Cerebral vascular disease	Myocardial infarction	Congestive heart failure	Cirrhosis	Malignancy	Charlson comorbidity index	Bedridden status	Previous abdominal surgery	Abdominal pain	Onset of symptoms before presentation	Onset of symptoms before presentation ≧3 days	Body temperature	Body temperature ≧38° C	Mean arterial pressure	Mean arterial pressure ≦60 mmHg	White blood cell count	White blood cell count ≧18 000/µL	Sepsis	Ultrasonography	Computed tomography	Gall bladder stones or sludge	Complicated cholecystitis	Grade I	Grade II	Grade III	Early operation not suggested by surgeons	Early operation rejected by patients	Parenteral antibiotics	Fever	Parenteral analgesic use	Nil per os (NPO)	Hospital stay	PCT drainage	Two-month recurrence	Two-month cholecystectomy	Two-month death	One-year recurrence	One-year cholecystectomy	One-year death	1st Bile culture	2nd Bile culture
78.5489	0	0	1	0	1	0	0	3	1	0	0	1	0	40.1	1	86.3333	0	4.78	0	1	0	1	0	0	1	0	0	1	0	17	1	0	4	19	24	0	0	0	0	0	1	Bile was not sent for bacterial culture	Bile was not sent for bacterial culture
92.271	1	1	1	0	0	0	0	3	1	0	0	1	0	37	0	130.333	0	15.47	0	0	0	1	1	0	1	0	0	0	0	16	0	0	5	18	13	0	0	0	0	0	0	No Growth	Bile was not sent for bacterial culture
79.332	1	0	0	0	0	0	0	0	0	0	1	2	0	38.8	1	103.667	0	14.47	0	1	0	1	1	1	0	1	0	1	0	15	2	2	3	16	39	0	0	0	0	0	0	Bile was not sent for bacterial culture	Bile was not sent for bacterial culture
77.8289	0	1	1	0	0	0	1	8	1	0	0	0	0	35.8	0	92.6667	0	9.7	0	0	0	1	0	0	1	0	0	0	0	20	0	1	0	25	21	0	0	0	0	0	0	Bile was not sent for bacterial culture	Bile was not sent for bacterial culture
87.0773	0	1	0	0	0	0	0	1	0	1	1	2	0	36.7	0	106.667	0	13.65	0	0	0	1	1	0	1	0	0	0	0	14	2	1	0	14	11	0	0	0	0	0	0	Bile was not sent for bacterial culture	Bile was not sent for bacterial culture
84.668	0	0	0	0	0	0	0	2	0	1	0	0	0	38	1	94	0	29.66	1	1	1	0	1	0	0	1	0	0	1	22	6	3	6	26	6	0	1	0	0	1	0	Bacteroides fragilis	Bile was not sent for bacterial culture
92.1971	0	0	1	0	0	0	0	2	1	0	0	0	0	36.3	0	95.6667	0	16.5	0	0	0	1	1	1	0	1	0	1	0	16	0	0	5	18	12	0	0	0	1	0	0	Bile was not sent for bacterial culture	Bile was not sent for bacterial culture
73.1964	1	0	0	0	0	0	0	3	0	0	1	0	0	37.8	0	97.6667	0	7.95	0	0	1	1	1	0	1	0	0	1	0	18	8	0	5	18	12	0	0	0	0	0	0	Bile was not sent for bacterial culture	Bile was not sent for bacterial culture
95.6085	1	1	0	0	0	0	0	1	0	0	0	0	0	38	1	106.333	0	15.52	0	1	0	1	1	0	1	0	0	1	0	18	8	1	11	22	11	0	0	0	0	0	0	Bile was not sent for bacterial culture	Bile was not sent for bacterial culture
84.794	1	0	0	0	0	0	0	0	0	0	1	3	1	36.4	0	97	0	10.4	0	0	1	1	0	0	1	0	0	1	0	6	0	2	2	8	15	0	0	0	0	1	0	Bile was not sent for bacterial culture	Bile was not sent for bacterial culture
69.6427	1	0	0	0	0	0	0	1	0	0	1	3	1	36.6	0	103.333	0	16.6	0	0	1	1	0	1	0	1	0	1	0	20	0	2	1	21	11	1	0	0	1	0	0	Bile was not sent for bacterial culture	Bile was not sent for bacterial culture
90.7132	1	1	0	0	0	0	0	1	0	0	0	0	0	38.5	1	74.6667	0	14.96	0	1	0	1	0	0	0	0	1	0	0	19	1	0	1	25	18	0	0	0	0	0	0	Bile was not sent for bacterial culture	Bile was not sent for bacterial culture
89.6893	1	0	1	1	0	0	0	5	0	0	0	1	0	38.7	1	104.333	0	22.79	1	1	0	1	0	0	0	0	1	0	0	76	3	1	8	82	77	0	0	0	0	0	0	Escherichia coli	Bile was not sent for bacterial culture
81.462	1	0	0	0	0	0	1	2	0	1	1	1	0	37.6	0	88	0	13.75	0	1	0	1	0	0	0	0	1	1	0	12	1	1	6	12	17	0	0	0	0	0	0	Bile was not sent for bacterial culture	Bile was not sent for bacterial culture
49.7221	1	0	0	0	0	0	0	0	0	0	1	1	0	36.5	0	109	0	15.88	0	1	0	1	1	0	1	0	0	1	0	7	0	2	2	8	6	0	0	0	0	0	0	Escherichia coli	Aeromonas hydrophila
75.4196	1	1	1	0	0	0	0	4	0	1	0	0	0	38.5	1	80.6667	0	8.39	0	0	1	1	1	0	1	0	0	1	0	13	2	5	0	30	6	0	0	0	0	0	0	Bile was not sent for bacterial culture	Bile was not sent for bacterial culture
68.4572	1	0	0	0	0	0	1	2	0	0	1	0	0	37	0	89.6667	0	11.11	0	0	1	1	1	0	1	0	0	1	0	17	3	2	2	19	18	0	0	0	0	0	0	Enterococcus species	Bile was not sent for bacterial culture
82.5298	1	0	0	0	0	0	0	0	0	0	1	1	0	36.6	0	60.3333	1	17.11	0	0	1	1	1	0	1	0	0	1	0	16	2	0	2	20	16	0	0	0	0	0	0	No Growth	Bile was not sent for bacterial culture
87.2005	1	0	0	1	0	0	0	3	0	1	1	0	0	36.4	0	121	0	20.5	1	0	1	1	1	1	0	1	0	0	1	23	9	2	12	28	13	1	0	0	1	0	0	No Growth	Bile was not sent for bacterial culture
76.4216	1	0	0	0	0	0	1	2	0	1	1	3	1	36.1	0	119.667	0	8.73	0	0	0	1	1	0	1	0	0	0	0	9	0	4	2	10	18	0	0	0	0	1	0	Bile was not sent for bacterial culture	Bile was not sent for bacterial culture
59.8357	1	1	1	0	0	0	0	2	0	0	1	2	0	36.7	0	104.667	0	9.67	0	0	0	1	1	0	1	0	0	0	1	13	1	1	2	14	13	0	0	0	0	1	0	No Growth	Bile was not sent for bacterial culture
90.7817	0	0	1	1	0	0	0	4	1	0	1	0	0	37.5	0	72.6667	0	17.44	0	1	1	1	1	0	1	0	0	1	0	18	4	0	4	19	36	0	0	0	0	0	0	No Growth	Bile was not sent for bacterial culture
59.0281	0	1	0	0	0	0	0	1	0	0	1	1	0	36.4	0	129.667	0	4.25	0	0	1	0	1	0	1	0	0	0	1	10	3	6	7	12	31	0	0	0	0	0	0	Bile was not sent for bacterial culture	Bile was not sent for bacterial culture
62.8337	0	1	0	0	0	0	0	1	0	1	0	6	1	36.6	0	86.3333	0	8.41	0	0	1	0	1	0	0	1	0	1	0	29	0	1	5	32	14	0	0	0	0	0	0	Bile was not sent for bacterial culture	Bile was not sent for bacterial culture
80.8679	1	1	1	0	0	0	0	2	0	0	0	0	0	36	0	85.6667	0	14.38	0	0	0	1	1	1	0	0	1	1	0	28	1	1	2	29	11	0	0	0	0	0	0	Klebsiella pneumoniae	Bile was not sent for bacterial culture
86.0424	0	0	0	0	0	0	0	0	0	0	0	0	0	37.5	0	103	0	7.35	0	0	0	1	1	0	1	0	0	1	0	26	6	0	10	48	34	0	0	0	0	0	0	No Growth	Bile was not sent for bacterial culture
61.7385	1	0	0	0	0	0	0	0	0	1	1	10	1	40.1	1	86.6667	0	7.76	0	1	0	1	1	1	0	1	0	0	1	10	3	0	2	10	27	0	0	0	0	0	0	Bile was not sent for bacterial culture	Bile was not sent for bacterial culture
80.3833	0	0	1	0	0	0	0	2	0	0	0	7	1	38.1	1	113.667	0	17.39	0	1	0	1	1	1	0	1	0	1	0	25	0	1	8	25	47	0	0	0	0	0	0	Klebsiella pneumoniae	Bile was not sent for bacterial culture
31.0089	0	0	0	0	0	0	0	0	0	1	1	3	1	38.5	1	93.6667	0	10.02	0	1	1	0	1	0	1	0	0	1	0	27	4	4	2	29	12	0	0	0	0	0	0	Bile was not sent for bacterial culture	Bile was not sent for bacterial culture
67.4743	1	0	1	0	0	0	0	2	1	0	1	0	0	37.2	0	81.3333	0	18.15	1	1	0	1	1	0	0	0	1	0	1	24	1	0	3	31	42	0	0	0	0	0	0	No Growth	Bile was not sent for bacterial culture
86.3765	0	1	1	0	0	0	0	3	0	0	0	0	0	37.4	0	78.3333	0	9.22	0	0	1	1	1	0	1	0	0	0	1	12	1	0	3	13	14	0	0	0	0	0	0	Bile was not sent for bacterial culture	Bile was not sent for bacterial culture
59.3566	1	1	1	0	0	0	0	3	0	0	1	4	1	37.1	0	62.3333	1	12.05	0	0	1	1	1	0	0	1	0	1	0	3	1	2	3	4	13	1	0	0	1	0	0	Bile was not sent for bacterial culture	Bile was not sent for bacterial culture
74.1081	1	0	0	0	0	0	0	0	0	1	1	4	1	37.2	0	93.3333	0	12.4	0	0	0	1	1	0	0	1	0	0	0	7	3	0	3	7	14	0	0	0	0	0	0	No Growth	Bile was not sent for bacterial culture
77.4428	1	1	1	0	0	0	0	4	0	0	0	0	0	39.8	1	71	0	15.68	0	1	1	1	0	0	1	0	0	1	0	4	2	1	3	11	9	0	0	0	0	0	0	No Growth	Bile was not sent for bacterial culture
69.4538	1	1	0	0	0	1	0	4	0	0	0	2	0	35.8	0	105	0	13.02	0	1	0	1	1	0	1	0	0	1	0	6	4	0	0	13	14	0	0	0	0	1	0	No Growth	Bile was not sent for bacterial culture
67.885	1	1	0	1	0	0	0	3	1	0	0	3	1	37.1	0	114	0	11.2	0	0	1	1	1	1	0	0	1	1	0	9	0	5	3	23	19	0	0	0	0	0	0	Bile was not sent for bacterial culture	Bile was not sent for bacterial culture
70.3162	0	1	1	1	0	0	0	3	0	1	1	4	1	37.7	0	99	0	27.97	1	1	0	1	1	0	0	1	0	1	0	3	0	1	3	4	18	0	0	0	0	0	0	Bile was not sent for bacterial culture	Bile was not sent for bacterial culture
68.8077	0	0	1	0	0	0	1	4	0	0	1	7	1	36.3	0	113.667	0	10.67	0	0	1	1	1	1	0	1	0	0	1	14	0	3	2	66	32	0	1	0	0	1	0	No Growth	Bile was not sent for bacterial culture
81.0787	1	1	0	0	0	0	0	1	0	0	1	3	1	36.2	0	101	0	12	0	0	0	1	0	0	1	0	0	1	0	11	0	0	8	13	11	0	0	0	0	0	0	Bile was not sent for bacterial culture	Bile was not sent for bacterial culture
72.4381	0	1	0	0	0	1	1	4	0	1	1	8	1	36.3	0	92.3333	0	15.3	0	1	1	1	1	0	0	1	0	1	0	10	2	3	2	10	26	0	0	0	0	0	0	Bile was not sent for bacterial culture	Bile was not sent for bacterial culture
70.9405	0	1	0	0	0	0	0	1	0	1	1	14	1	36.7	0	97	0	10.04	0	0	0	1	0	0	0	1	0	0	1	13	1	1	7	15	60	0	0	0	0	0	0	No Growth	Bile was not sent for bacterial culture
74.4476	0	1	1	0	0	0	0	4	0	0	1	4	1	35.7	0	101	0	7.2	0	0	1	1	1	0	0	1	0	1	0	14	4	0	4	14	12	0	0	0	0	0	0	Bile was not sent for bacterial culture	Bile was not sent for bacterial culture
82.423	1	0	0	0	0	0	1	2	0	1	0	2	0	37.7	0	107	0	16.96	0	1	0	1	0	1	0	0	1	0	0	7	3	0	4	9	41	1	0	0	1	0	0	No Growth	Bile was not sent for bacterial culture
70.1054	1	1	0	0	0	0	0	1	0	0	1	0	0	38.7	1	109.333	0	19.74	1	1	1	1	1	0	0	1	0	0	1	8	2	0	4	14	19	0	0	0	0	0	0	Bile was not sent for bacterial culture	Bile was not sent for bacterial culture
83.9945	1	1	1	0	0	0	0	3	0	0	1	1	0	36.5	0	105.333	0	14.88	0	0	1	1	1	0	1	0	0	1	0	17	2	0	4	21	14	0	0	0	0	0	0	No Growth	Bile was not sent for bacterial culture
87.948	0	0	0	0	0	0	0	0	0	1	1	0	0	36.2	0	102	0	6.23	0	0	0	1	1	0	1	0	0	1	0	70	3	2	3	20	13	0	0	0	0	0	0	Bile was not sent for bacterial culture	Bile was not sent for bacterial culture
65.0431	1	0	1	0	0	0	0	1	0	0	1	3	1	38.1	1	110	0	10.58	0	0	0	1	1	0	1	0	0	1	0	9	3	0	4	9	24	0	0	0	0	0	0	Bile was not sent for bacterial culture	Bile was not sent for bacterial culture
67.3265	0	0	0	0	1	0	0	1	0	0	1	1	0	39.2	1	98	0	9.31	0	1	1	0	1	1	0	1	0	0	1	36	5	4	2	41	22	0	0	0	0	0	0	No Growth	Bile was not sent for bacterial culture
60.2163	1	0	0	0	0	0	0	0	0	1	1	11	1	37.7	0	92.6667	0	22.43	1	1	0	1	0	1	0	1	0	0	1	7	0	0	3	9	11	1	0	0	1	0	0	No Growth	Bile was not sent for bacterial culture
77.1937	0	1	0	0	0	0	0	1	0	1	1	13	1	36	0	120	0	11.87	0	0	1	1	1	0	0	1	0	0	1	13	3	1	2	13	7	0	1	0	0	1	0	Bile was not sent for bacterial culture	Bile was not sent for bacterial culture
65.2786	1	1	0	0	0	0	0	1	0	0	1	3	1	36.9	0	68.6667	0	21.12	1	1	0	1	1	0	0	1	0	1	0	13	4	1	5	15	16	0	1	0	0	1	0	Bile was not sent for bacterial culture	Bile was not sent for bacterial culture
53.8535	1	1	0	0	0	0	0	5	0	0	1	1	0	37.1	0	88.3333	0	16.28	0	1	0	1	1	0	1	0	0	0	1	17	0	1	10	19	14	0	0	0	0	0	1	Bile was not sent for bacterial culture	Bile was not sent for bacterial culture
77.3005	1	1	0	1	0	0	0	2	0	0	1	2	0	36.3	0	114	0	10.5	0	0	1	0	1	0	1	0	0	0	1	18	0	0	3	20	16	0	0	0	0	0	0	No Growth	Bile was not sent for bacterial culture
74.5626	1	0	0	0	0	1	0	2	0	0	1	3	1	35	0	83	0	15.87	0	1	1	1	1	0	1	0	0	0	1	16	2	2	5	18	14	0	0	0	0	0	0	Escherichia coli	Bile was not sent for bacterial culture
61.1143	0	0	0	0	0	0	0	0	0	1	1	1	0	38.4	1	105.667	0	16.09	0	1	0	1	1	0	1	0	0	0	1	14	0	3	2	15	70	0	0	0	0	0	0	Bile was not sent for bacterial culture	Bile was not sent for bacterial culture
83.3238	0	0	0	0	0	0	0	0	0	0	1	1	0	37.6	0	76	0	5.76	0	0	1	1	1	0	1	0	0	0	0	7	0	1	3	8	20	0	0	0	1	0	0	Bile was not sent for bacterial culture	Bile was not sent for bacterial culture
65.0513	0	0	0	0	0	0	0	0	0	0	1	1	0	36.5	0	100	0	11.52	0	0	1	1	1	0	1	0	0	1	0	8	2	0	4	10	6	0	0	0	0	1	0	Bile was not sent for bacterial culture	Bile was not sent for bacterial culture
53.3388	0	0	0	0	0	0	0	0	0	0	1	3	1	37.5	0	116	0	21.07	1	1	1	0	1	0	0	1	0	0	1	14	4	3	3	16	10	0	0	0	0	0	0	Bile was not sent for bacterial culture	Bile was not sent for bacterial culture
61.8015	0	0	0	0	0	0	0	0	0	0	1	2	0	36.6	0	108.667	0	7.86	0	0	0	1	1	0	1	0	0	1	0	11	0	3	2	11	10	0	1	0	0	1	0	Bile was not sent for bacterial culture	Bile was not sent for bacterial culture
68.0712	1	1	0	0	0	0	0	1	0	0	1	1	0	36.3	0	98.3333	0	17.03	0	0	0	1	1	0	1	0	0	0	1	4	2	4	4	6	28	0	0	0	0	1	0	Bile was not sent for bacterial culture	Bile was not sent for bacterial culture
71.3155	1	0	0	0	1	0	0	1	0	0	1	5	1	39.6	1	121.667	0	11.62	0	1	1	1	1	0	0	0	1	1	0	16	0	3	3	34	15	0	0	0	0	0	0	Bile was not sent for bacterial culture	Bile was not sent for bacterial culture
77.3525	0	1	0	0	0	0	0	1	0	1	1	2	0	37.7	0	102.667	0	2.24	0	1	1	1	1	0	1	0	0	0	1	11	5	0	5	12	5	0	0	0	0	0	0	Bile was not sent for bacterial culture	Bile was not sent for bacterial culture
92.9884	0	0	0	0	0	0	0	0	0	0	1	1	0	36.7	0	75.3333	0	17.94	0	1	0	1	1	0	1	0	0	0	1	14	0	4	6	16	99	0	1	0	0	1	0	Bile was not sent for bacterial culture	Bile was not sent for bacterial culture
78.768	1	0	1	0	0	0	1	4	0	0	1	0	0	36.4	0	162.333	0	16.45	0	1	0	1	1	0	1	0	0	0	0	12	2	2	0	12	11	0	0	0	0	0	0	Bile was not sent for bacterial culture	Bile was not sent for bacterial culture
83.0828	0	0	1	0	0	0	1	4	1	0	1	1	0	38.2	1	53	1	9.93	0	0	1	1	1	0	1	0	0	0	1	27	2	1	4	36	15	0	0	0	0	0	0	No Growth	Bile was not sent for bacterial culture
60.2136	1	1	0	0	0	0	0	1	0	0	1	1	0	37.9	0	107.667	0	11.85	0	0	1	0	1	0	1	0	0	1	0	13	4	7	4	16	8	0	0	0	0	0	0	No Growth	Bile was not sent for bacterial culture
93.1828	0	0	0	0	0	0	0	0	0	0	1	1	0	38.1	1	79.3333	0	10.02	0	0	1	1	1	0	1	0	0	0	0	7	0	0	1	8	2	0	0	0	0	0	0	Bile was not sent for bacterial culture	Bile was not sent for bacterial culture
65.8371	0	0	0	0	0	0	0	0	0	0	1	6	1	38.3	1	84	0	11.96	0	0	0	1	1	0	0	1	0	0	1	14	3	2	3	14	19	0	1	0	0	1	0	Bile was not sent for bacterial culture	Bile was not sent for bacterial culture
49.1499	0	0	0	0	0	0	0	0	0	0	0	0	0	38.6	1	88.6667	0	8.52	0	1	0	1	1	0	1	0	0	0	1	12	0	0	0	14	43	0	1	0	0	1	0	Bile was not sent for bacterial culture	Bile was not sent for bacterial culture
70.8939	0	1	0	0	0	0	1	3	0	1	0	3	1	38	1	128	0	12.95	0	1	0	1	0	0	1	0	0	0	1	8	1	1	1	15	29	0	0	0	0	1	0	Bile was not sent for bacterial culture	Bile was not sent for bacterial culture
77.4127	1	0	0	0	0	0	0	0	0	0	1	2	0	38.3	1	113.667	0	19.56	1	0	1	1	1	0	0	1	0	1	0	13	0	0	3	13	29	0	0	0	0	0	0	Bile was not sent for bacterial culture	Bile was not sent for bacterial culture
91.0554	0	1	0	0	1	0	0	3	0	0	1	7	1	37.3	0	92	0	13.41	0	0	1	1	1	1	0	1	0	1	0	17	0	0	4	18	15	0	0	0	0	0	0	Klebsiella pneumoniae	Streptococcus anginosus
92.6489	0	0	0	0	0	0	0	0	0	0	0	7	1	37.1	0	88.3333	0	19.83	1	1	0	1	0	1	0	1	0	1	0	15	2	0	3	17	10	0	0	0	0	0	0	Bile was not sent for bacterial culture	Bile was not sent for bacterial culture
85.9713	0	0	0	0	0	0	0	0	0	0	1	3	1	38.1	1	59.3333	1	26.77	1	1	0	1	0	0	0	1	0	1	0	9	2	0	5	11	8	0	1	0	0	1	0	Bile was not sent for bacterial culture	Bile was not sent for bacterial culture
71.4278	1	0	1	0	0	0	0	2	0	0	0	1	0	35.3	0	104.667	0	17.55	0	1	1	1	1	1	0	1	0	0	1	23	0	0	0	25	30	0	0	0	0	0	0	Bile was not sent for bacterial culture	Bile was not sent for bacterial culture
62.1054	1	0	0	0	0	1	0	3	0	1	1	3	1	37.2	0	102	0	11.56	0	0	1	1	1	0	1	0	0	1	0	20	3	0	3	26	17	0	1	0	0	1	0	Bile was not sent for bacterial culture	Bile was not sent for bacterial culture
69.1061	1	1	0	0	0	0	0	1	0	0	1	1	0	37.9	0	98.3333	0	16.5	0	1	0	1	1	0	1	0	0	0	1	25	4	1	7	26	14	0	1	0	0	1	0	Bile was not sent for bacterial culture	Bile was not sent for bacterial culture
41.7714	0	0	0	0	0	0	0	0	0	0	1	7	1	38.3	1	106.333	0	14.15	0	1	0	1	1	0	0	1	0	1	0	9	0	2	3	10	19	0	1	0	0	1	0	Bile was not sent for bacterial culture	Bile was not sent for bacterial culture
85.7878	0	0	1	0	0	0	0	2	0	1	1	0	0	37.9	0	98	0	23.05	1	1	1	1	1	0	0	1	0	1	0	14	0	0	7	19	59	1	0	0	1	0	0	Bile was not sent for bacterial culture	Bile was not sent for bacterial culture
83.1403	1	0	0	0	0	0	0	0	0	0	1	2	0	36.2	0	106.667	0	16.77	0	1	1	1	1	0	1	0	0	1	0	13	2	0	5	16	13	0	0	0	0	0	0	Bile was not sent for bacterial culture	Bile was not sent for bacterial culture
90.7953	1	1	0	0	0	0	0	2	0	0	1	0	0	36.9	0	84	0	4.62	0	0	1	1	1	0	1	0	0	1	0	13	8	3	2	21	16	0	0	0	0	0	0	No Growth	Bile was not sent for bacterial culture
73.9877	1	0	0	0	0	0	1	3	0	0	1	0	0	37.6	0	91.3333	0	18.4	1	0	0	1	0	1	0	1	0	1	0	14	2	0	2	16	6	0	0	0	0	0	0	Bile was not sent for bacterial culture	Bile was not sent for bacterial culture
78.3053	0	1	1	0	0	1	0	4	0	0	0	7	1	36.2	0	101.333	0	19.28	1	1	1	1	1	1	0	1	0	0	1	14	0	0	6	15	19	1	0	0	1	0	0	Bile was not sent for bacterial culture	Bile was not sent for bacterial culture
65.9849	1	1	0	0	0	0	0	1	0	0	0	1	0	36.8	0	96.6667	0	10.7	0	0	1	1	1	0	1	0	0	1	0	7	6	3	7	12	24	0	0	0	0	1	0	Bile was not sent for bacterial culture	Bile was not sent for bacterial culture
70.4449	1	1	0	0	0	0	0	1	0	1	1	3	1	37.1	0	158.667	0	9.76	0	0	1	1	1	1	0	1	0	0	1	10	2	0	6	14	24	1	0	0	1	0	0	Bile was not sent for bacterial culture	Bile was not sent for bacterial culture
84.0931	1	1	0	0	0	0	0	1	0	1	1	1	0	36	0	96.6667	0	8.17	0	0	0	1	1	0	1	0	0	0	1	10	0	2	3	10	3	0	0	0	1	0	0	Viridans streptococci	Klebsiella pneumoniae
68.7858	0	1	0	0	0	1	0	4	0	1	1	0	0	37.3	0	94	0	11.69	0	0	1	1	1	0	1	0	0	1	0	30	0	2	8	33	2	0	0	0	0	1	0	No Growth	Bile was not sent for bacterial culture
79.9781	0	1	0	0	0	0	1	3	0	0	0	4	1	36.1	0	128	0	13.21	0	1	0	1	1	0	0	1	0	1	0	9	2	1	2	11	13	0	1	0	0	1	0	Bile was not sent for bacterial culture	Bile was not sent for bacterial culture
69.4401	1	0	0	0	0	0	0	0	0	1	1	5	1	36.7	0	85	0	9.78	0	0	0	1	1	1	0	1	0	0	0	14	0	0	3	15	36	0	1	0	0	1	0	Bile was not sent for bacterial culture	Bile was not sent for bacterial culture
86.9624	1	0	0	0	0	0	0	3	0	0	0	3	1	38.1	1	86.6667	0	21.27	1	0	0	1	0	0	0	1	0	1	0	15	0	0	9	21	10	0	0	0	0	0	0	Bile was not sent for bacterial culture	Bile was not sent for bacterial culture
58.987	0	0	0	0	0	0	0	0	0	0	1	0	0	37.1	0	74.6667	0	5.43	0	0	0	1	1	0	1	0	0	1	0	14	3	1	2	16	13	0	1	0	0	1	0	Bile was not sent for bacterial culture	Bile was not sent for bacterial culture
63.4251	1	0	0	0	0	0	0	0	0	1	1	7	1	36.4	0	66	0	10.89	0	0	1	1	0	1	0	1	0	1	0	15	1	3	9	15	7	0	1	0	0	1	0	Bile was not sent for bacterial culture	Bile was not sent for bacterial culture
80.6845	0	0	0	0	0	0	0	0	0	0	1	4	1	36.4	0	144.333	0	20.03	1	0	1	0	1	0	0	1	0	0	0	5	0	0	2	7	15	0	0	0	0	1	0	Bile was not sent for bacterial culture	Bile was not sent for bacterial culture
74.0041	1	1	0	0	0	0	0	1	0	0	1	1	0	39.4	1	92	0	16.85	0	1	0	1	0	1	0	1	0	1	0	12	6	3	3	14	9	0	0	0	0	0	0	Bile was not sent for bacterial culture	Bile was not sent for bacterial culture
66.1903	0	0	0	0	0	0	0	0	0	1	1	1	0	36.7	0	82	0	11.16	0	0	0	1	0	0	1	0	0	0	1	10	2	2	2	10	8	0	0	0	0	0	0	Bile was not sent for bacterial culture	Bile was not sent for bacterial culture
91.8029	1	0	0	0	0	0	0	0	0	0	1	1	0	36.4	0	99.6667	0	6.22	0	0	0	1	1	0	1	0	0	1	0	18	3	1	4	23	13	0	0	0	0	0	0	Bile was not sent for bacterial culture	Bile was not sent for bacterial culture
64.8953	0	1	0	0	0	0	0	1	0	0	1	2	0	39	1	80.3333	0	13.56	0	1	0	1	0	1	0	1	0	0	1	10	2	4	5	10	39	0	1	0	0	1	0	No Growth	Bile was not sent for bacterial culture
76.2108	1	1	0	0	0	0	0	1	0	0	1	3	1	36.8	0	92.6667	0	11.77	0	0	0	1	0	0	1	0	0	0	1	12	2	2	4	13	10	0	0	0	0	0	0	Bile was not sent for bacterial culture	Bile was not sent for bacterial culture
81.692	1	1	0	0	0	0	0	1	0	1	1	2	0	36.5	0	122.333	0	26.73	1	1	1	1	1	0	0	1	0	0	1	11	0	4	5	12	11	0	0	0	0	0	0	Bile was not sent for bacterial culture	Bile was not sent for bacterial culture
95.3265	0	0	1	0	0	0	0	2	0	0	1	1	0	36.7	0	111.333	0	7.95	0	0	0	1	1	0	1	0	0	0	1	10	0	0	4	10	7	0	0	0	0	0	0	Bile was not sent for bacterial culture	Bile was not sent for bacterial culture
79.5346	0	1	0	0	0	0	0	1	0	0	1	7	1	38.7	1	127.333	0	28.88	1	1	1	0	0	0	0	1	0	0	0	22	0	0	0	25	21	0	1	0	0	1	0	Bile was not sent for bacterial culture	Bile was not sent for bacterial culture
51.1951	0	0	0	0	0	0	0	0	0	0	1	3	1	37	0	147	0	9.09	0	0	1	1	1	1	0	1	0	0	1	9	2	0	6	15	12	0	0	0	0	1	0	No Growth	Bile was not sent for bacterial culture
40.0575	0	0	0	0	0	0	0	0	0	0	1	4	1	36.4	0	92	0	13.78	0	0	1	1	0	1	0	1	0	1	0	15	2	2	5	30	7	0	0	0	0	1	0	No Growth	Bile was not sent for bacterial culture
66.5873	1	1	0	0	0	0	0	1	0	1	0	7	1	35.3	0	111.667	0	6.23	0	0	1	0	1	1	0	1	0	1	0	28	3	0	6	30	18	0	1	0	0	1	0	No Growth	Bile was not sent for bacterial culture
69.8015	0	0	1	0	0	0	0	1	0	0	0	5	1	37.7	0	148.667	0	10.33	0	0	1	1	1	1	0	1	0	1	0	15	2	0	1	18	7	0	0	0	0	1	0	Bile was not sent for bacterial culture	Bile was not sent for bacterial culture
80.2163	1	1	0	0	0	0	1	3	0	1	1	3	1	38.5	1	72	0	10.12	0	1	0	1	1	0	1	0	0	0	1	8	0	0	5	9	6	0	0	0	0	1	0	Bile was not sent for bacterial culture	Bile was not sent for bacterial culture
86.9268	0	1	1	0	0	0	0	2	0	0	0	1	0	36.2	0	76.3333	0	4.85	0	0	0	1	1	0	0	0	1	0	0	7	0	0	2	9	27	0	0	0	0	0	0	No Growth	Bile was not sent for bacterial culture
82.2943	0	0	0	1	0	0	0	1	0	0	1	1	0	36.9	0	75	0	12.71	0	0	0	1	1	0	1	0	0	1	0	17	1	1	2	19	17	0	0	0	0	0	1	Bile was not sent for bacterial culture	Bile was not sent for bacterial culture
56.7474	1	1	0	0	0	0	0	1	0	0	1	1	0	38.2	1	145	0	20.14	1	1	0	1	1	0	0	1	0	1	0	39	0	2	1	42	25	0	1	0	0	1	0	Klebsiella pneumoniae	Bile was not sent for bacterial culture
81.9357	1	0	1	0	0	0	0	1	0	0	1	6	1	37.9	0	94.3333	0	15.43	0	1	0	1	1	0	0	1	0	0	1	16	3	0	5	21	19	0	0	0	0	0	0	Bile was not sent for bacterial culture	Bile was not sent for bacterial culture
81.1554	1	1	1	0	0	0	0	2	0	1	1	7	1	38.5	1	101.667	0	11.02	0	1	1	1	1	1	0	1	0	1	0	8	6	1	1	31	10	0	0	0	0	0	0	Bile was not sent for bacterial culture	Bile was not sent for bacterial culture
84.1342	1	0	1	0	0	0	0	3	0	0	0	3	1	36.8	0	106.333	0	8.66	0	0	1	1	1	1	0	1	0	0	1	28	9	3	4	48	14	0	1	0	0	1	0	No Growth	Bile was not sent for bacterial culture
79.6742	1	0	0	0	0	0	1	2	0	0	1	6	1	37.8	0	129.667	0	27.41	1	1	0	1	1	0	0	0	1	1	0	12	2	3	2	13	50	0	0	0	0	0	0	Bile was not sent for bacterial culture	Bile was not sent for bacterial culture
41.0678	0	1	0	0	0	0	0	1	0	0	1	0	0	37.7	0	96	0	10.9	0	0	1	1	1	1	0	1	0	0	1	15	4	7	6	17	14	0	0	0	0	0	0	No Growth	Bile was not sent for bacterial culture
91.4086	1	1	1	0	0	0	1	5	0	0	1	3	1	36.9	0	87.3333	0	11.68	0	0	0	1	1	0	1	0	0	0	0	25	0	0	6	27	25	0	0	0	0	0	0	Klebsiella pneumoniae	Escherichia coli
60.1889	1	1	1	0	0	0	0	4	0	0	1	2	0	38.2	1	75	0	12.09	0	1	1	1	1	1	0	1	0	1	0	13	0	0	4	17	10	0	0	0	0	0	0	Bile was not sent for bacterial culture	Bile was not sent for bacterial culture
35.5537	1	0	0	0	0	0	0	0	0	0	1	1	0	36.2	0	92	0	9.2	0	0	0	1	1	0	1	0	0	1	0	14	4	2	2	15	13	0	1	0	0	1	0	Bile was not sent for bacterial culture	Bile was not sent for bacterial culture
75.6277	1	1	0	0	0	0	0	1	0	0	1	7	1	37.7	0	110.333	0	15.78	0	1	0	1	1	1	0	1	0	1	0	32	4	0	1	33	44	0	0	0	1	0	0	Enterobacter cloacae	Bile was not sent for bacterial culture
34.0507	1	0	0	0	0	0	1	2	0	0	1	1	0	37.1	0	106.333	0	31.62	1	0	0	1	0	0	0	1	0	1	0	11	0	0	2	20	6	0	0	0	0	0	0	Bile was not sent for bacterial culture	Bile was not sent for bacterial culture
76.5339	1	0	1	0	1	0	0	3	0	0	1	0	0	37.1	0	78.6667	0	6.34	0	0	1	1	0	0	1	0	0	1	0	21	0	1	2	28	24	0	0	0	0	0	0	No Growth	Bile was not sent for bacterial culture
70.8857	0	0	0	0	0	0	0	0	0	0	0	2	0	37.8	0	128.333	0	25.69	1	1	1	1	1	0	0	1	0	0	0	9	0	0	0	9	6	0	0	0	0	0	0	Bile was not sent for bacterial culture	Bile was not sent for bacterial culture
63.2033	1	0	0	0	0	0	0	0	0	0	1	1	0	37.5	0	121.333	0	10.4	0	0	0	1	1	0	1	0	0	1	0	7	0	2	1	9	6	0	1	0	0	1	0	No Growth	Bile was not sent for bacterial culture
67.7344	0	0	0	0	1	0	0	1	0	0	1	1	0	35.6	0	76.6667	0	10.44	0	1	1	0	0	0	0	0	1	1	0	8	0	0	2	10	4	0	0	0	0	0	0	Bile was not sent for bacterial culture	Bile was not sent for bacterial culture
79.8494	0	1	0	0	0	1	0	2	0	0	0	1	0	36.6	0	137.333	0	8.73	0	0	1	1	1	0	1	0	0	1	0	15	4	0	2	23	10	0	0	0	0	0	0	No Growth	Bile was not sent for bacterial culture
50.653	1	0	0	0	0	0	0	0	0	0	0	1	0	36.9	0	105	0	20.25	1	1	1	1	1	0	0	1	0	1	0	16	3	3	3	19	9	0	1	0	0	1	0	Bile was not sent for bacterial culture	Bile was not sent for bacterial culture
70.9596	0	1	0	0	0	0	0	1	0	0	1	3	1	36.6	0	91.3333	0	5.2	0	0	1	1	1	0	1	0	0	0	1	13	0	0	3	15	11	0	0	0	0	1	0	Bile was not sent for bacterial culture	Bile was not sent for bacterial culture
44.9144	1	0	0	0	0	0	1	6	0	1	1	1	0	37.2	0	112	0	17.12	0	0	0	1	1	1	0	1	0	1	0	10	2	2	3	14	43	0	0	0	0	0	1	Fusobacterium species	Bile was not sent for bacterial culture
80.2957	0	1	0	0	0	0	0	1	0	0	1	7	1	36.5	0	83.6667	0	16.31	0	1	0	1	1	1	0	1	0	0	0	8	1	1	1	8	6	0	0	0	0	0	0	Bile was not sent for bacterial culture	Bile was not sent for bacterial culture
33.3251	1	1	0	0	0	0	0	7	0	0	1	4	1	36.3	0	105.667	0	10.34	0	0	1	1	0	0	0	1	0	1	0	11	3	2	1	13	12	0	0	0	0	0	0	Bile was not sent for bacterial culture	Bile was not sent for bacterial culture
41.974	1	0	0	0	0	0	0	0	0	0	1	0	0	37.3	0	97.6667	0	12.08	0	0	0	1	0	0	1	0	0	1	0	11	0	3	3	13	10	0	0	0	1	0	0	Bile was not sent for bacterial culture	Bile was not sent for bacterial culture
58.3628	1	0	0	0	0	0	0	0	0	0	1	0	0	37.2308	0	90.0641	0	14.608	0	1	0	1	1	0	1	0	0	1	0	10	0	1	2	12	10	0	0	0	0	1	0	Bile was not sent for bacterial culture	Bile was not sent for bacterial culture
76.6324	1	0	0	0	0	0	0	0	0	0	1	2	0	36	0	95.6667	0	15.05	0	0	1	1	1	1	0	1	0	1	0	18	6	0	2	22	15	0	0	0	0	0	0	No Growth	Bile was not sent for bacterial culture
58.7296	1	1	0	0	0	0	0	1	0	0	1	4	1	37.5	0	82	0	11.92	0	0	1	1	1	1	0	1	0	1	0	29	2	0	2	30	29	0	1	0	0	1	0	Bile was not sent for bacterial culture	Bile was not sent for bacterial culture
64.898	1	0	0	0	0	0	0	0	0	0	1	0	0	39.6	1	99	0	7.62	0	1	0	1	0	0	1	0	0	0	1	24	0	2	2	30	25	0	0	0	0	0	0	No Growth	Bile was not sent for bacterial culture
84.0986	0	0	0	0	0	0	0	0	0	0	1	21	1	36.8	0	139.333	0	12	0	0	0	1	1	0	0	1	0	0	0	13	3	0	3	15	8	0	1	0	0	1	0	Bile was not sent for bacterial culture	Bile was not sent for bacterial culture
97.6126	0	0	0	0	0	0	0	0	0	0	1	1	0	36.1	0	90	0	7.14	0	0	0	1	1	0	1	0	0	1	0	3	0	0	2	4	29	0	0	0	0	0	0	Bile was not sent for bacterial culture	Bile was not sent for bacterial culture
57.7495	1	0	0	0	0	0	0	1	0	1	1	1	0	37.6	0	92.6667	0	12.48	0	0	1	1	1	0	1	0	0	1	0	6	4	1	2	8	17	0	0	0	0	1	0	Bile was not sent for bacterial culture	Bile was not sent for bacterial culture
67.2334	1	0	1	0	0	0	0	2	0	1	0	0	0	36.2	0	110.333	0	11.68	0	0	0	1	1	0	1	0	0	1	0	7	1	0	1	7	28	0	0	0	0	0	0	Bile was not sent for bacterial culture	Bile was not sent for bacterial culture
41.9932	1	0	0	0	0	0	1	4	0	0	1	0	0	37.3	0	108.333	0	11.44	0	0	1	1	1	0	1	0	0	0	1	9	0	2	7	11	14	0	0	0	0	0	0	Klebsiella pneumoniae	Bile was not sent for bacterial culture
73.3169	1	0	0	0	0	0	0	0	0	1	1	3	1	36.7	0	98	0	10.96	0	0	0	1	1	0	1	0	0	0	1	8	2	1	4	10	7	1	0	0	1	0	0	Bile was not sent for bacterial culture	Bile was not sent for bacterial culture
74.0945	0	0	0	0	0	0	0	0	0	0	1	3	1	38	1	92.6667	0	8.79	0	0	1	1	1	0	1	0	0	1	0	11	2	1	5	13	11	0	0	0	0	0	0	Bile was not sent for bacterial culture	Bile was not sent for bacterial culture
56.7666	1	0	0	0	0	0	0	0	0	0	1	0	0	36	0	102.667	0	6.83	0	0	1	1	1	0	1	0	0	1	0	8	2	2	1	11	8	0	0	0	0	0	0	Bile was not sent for bacterial culture	Bile was not sent for bacterial culture
73.1499	1	0	0	0	0	0	0	0	0	1	1	4	1	37.3	0	89.3333	0	17.68	0	1	0	1	0	1	0	1	0	1	0	13	2	0	3	14	18	0	0	0	0	0	0	Bile was not sent for bacterial culture	Bile was not sent for bacterial culture
27.1431	1	0	0	0	0	0	0	0	0	0	1	5	1	39.6	1	89.6667	0	14.49	0	1	0	1	1	0	0	1	0	0	1	13	0	1	0	14	7	0	0	0	0	0	0	Bile was not sent for bacterial culture	Bile was not sent for bacterial culture
79.2936	1	0	0	0	0	0	0	0	0	0	0	1	0	35.8	0	154	0	14	0	1	1	0	1	1	0	1	0	1	0	23	3	0	0	25	14	0	1	0	0	1	0	Bile was not sent for bacterial culture	Bile was not sent for bacterial culture
66.7817	1	1	0	0	0	0	1	7	0	0	1	1	0	37.5	0	113.333	0	11.72	0	0	1	1	1	0	1	0	0	0	1	16	3	0	7	20	67	0	0	1	0	0	1	Bile was not sent for bacterial culture	Bile was not sent for bacterial culture
56.5202	1	0	0	0	0	0	0	0	0	0	1	2	0	37.1	0	133.667	0	8.08	0	0	0	1	1	0	1	0	0	0	1	8	4	0	1	10	30	0	0	0	0	0	0	Bile was not sent for bacterial culture	Bile was not sent for bacterial culture
94.2341	1	0	0	0	0	0	0	1	1	0	0	1	0	36.6	0	107.333	0	7.1	0	0	0	1	0	0	0	0	1	1	0	32	0	0	2	46	105	0	0	0	0	0	0	Aeromonas caviae	Bile was not sent for bacterial culture
74.1492	1	1	0	0	0	0	0	1	0	0	1	4	1	36.2	0	110	0	11.88	0	0	1	0	1	0	0	1	0	1	0	10	0	0	3	10	7	0	0	0	0	0	0	Bile was not sent for bacterial culture	Bile was not sent for bacterial culture
58.2478	1	0	0	0	0	0	0	0	0	0	1	1	0	39.4	1	128.333	0	9.59	0	1	0	1	0	0	1	0	0	1	0	11	0	0	4	14	12	0	1	0	0	1	0	Bile was not sent for bacterial culture	Bile was not sent for bacterial culture
72.1342	1	1	0	0	0	0	0	2	0	1	1	3	1	39	1	93	0	12.02	0	1	1	1	1	1	0	1	0	1	0	15	3	1	1	15	8	0	1	0	0	1	0	Bile was not sent for bacterial culture	Bile was not sent for bacterial culture
78.8665	1	1	0	0	0	0	1	3	0	1	0	0	0	36.8	0	93.3333	0	3.81	0	0	0	1	1	0	0	0	1	0	0	8	2	1	1	11	21	1	0	0	1	0	0	Bile was not sent for bacterial culture	Bile was not sent for bacterial culture
45.1307	1	0	0	0	0	0	0	0	0	1	1	1	0	37.1	0	80.6667	0	7.45	0	0	0	1	0	0	1	0	0	1	0	6	2	1	2	6	6	0	1	0	0	1	0	Bile was not sent for bacterial culture	Bile was not sent for bacterial culture
78.6448	1	1	0	0	1	0	1	4	0	1	1	3	1	39.4	1	72.6667	0	11.32	0	1	1	1	1	0	1	0	0	0	0	9	0	0	3	12	22	1	0	0	1	0	0	No Growth	Bile was not sent for bacterial culture
54.5955	1	1	0	0	0	0	0	1	0	0	1	1	0	36.7	0	140.667	0	11.84	0	0	0	1	1	0	1	0	0	0	1	7	5	2	2	8	34	0	1	0	0	1	0	Enterobacter cloacae	Bile was not sent for bacterial culture
53.1718	1	0	0	0	0	0	0	0	0	0	1	4	1	36.3	0	90.6667	0	8.81	0	0	0	1	0	1	0	1	0	1	0	7	2	0	2	9	7	0	1	0	0	1	0	Bile was not sent for bacterial culture	Bile was not sent for bacterial culture
77.8179	1	1	0	0	0	0	0	1	0	1	0	0	0	37.5	0	116.667	0	5.58	0	1	1	1	1	0	1	0	0	1	0	12	6	1	10	21	36	0	1	0	0	1	0	Bile was not sent for bacterial culture	Bile was not sent for bacterial culture
54.037	0	0	0	0	0	0	0	0	0	1	1	2	0	38	1	68.6667	0	7.47	0	0	0	1	1	0	1	0	0	1	0	13	0	1	1	17	16	0	1	0	0	1	0	Bile was not sent for bacterial culture	Bile was not sent for bacterial culture
61.7139	1	0	0	0	0	0	0	0	0	0	1	1	0	37.8	0	82	0	5.71	0	0	0	1	0	0	1	0	0	1	0	11	0	1	3	11	7	0	0	0	0	1	0	Bile was not sent for bacterial culture	Bile was not sent for bacterial culture
29.8234	0	0	0	0	0	0	0	0	0	0	1	7	1	37.1	0	115	0	7.67	0	0	0	1	1	0	0	1	0	0	1	10	2	2	1	12	11	0	0	0	0	1	0	Bile was not sent for bacterial culture	Bile was not sent for bacterial culture
60.1506	1	1	0	0	0	0	0	1	0	0	1	2	0	38.5	1	77.3333	0	11.98	0	1	0	1	1	0	1	0	0	1	0	7	2	2	1	9	24	0	0	0	0	0	0	Bile was not sent for bacterial culture	Bile was not sent for bacterial culture
62.7844	1	0	0	0	0	0	0	1	0	0	1	0	0	35.9	0	68.3333	0	19.11	1	1	0	1	0	0	0	1	0	1	0	16	0	1	5	17	11	0	1	0	0	1	0	Bile was not sent for bacterial culture	Bile was not sent for bacterial culture
86.9788	1	0	0	0	0	0	0	1	0	0	1	2	0	37.8	0	100.333	0	13.33	0	0	0	1	1	0	1	0	0	1	0	15	0	0	5	16	296	1	0	0	1	0	0	Bile was not sent for bacterial culture	Bile was not sent for bacterial culture
52.6653	1	0	0	0	0	0	0	0	0	0	1	1	0	39.4	1	69	0	15.28	0	1	0	1	0	0	1	0	0	0	0	10	0	1	5	11	5	0	0	0	0	0	0	Bile was not sent for bacterial culture	Bile was not sent for bacterial culture
52.5284	1	1	0	0	0	0	0	1	0	0	0	2	0	36.6	0	93.3333	0	11.94	0	0	0	1	1	0	1	0	0	0	0	12	0	2	0	12	8	0	1	0	0	1	0	Bile was not sent for bacterial culture	Bile was not sent for bacterial culture
51.8166	1	0	0	0	0	1	0	3	0	0	1	1	0	38.1	1	107	0	21.95	1	1	0	1	0	0	0	1	0	0	0	10	3	2	1	20	8	0	0	0	0	0	0	Bile was not sent for bacterial culture	Bile was not sent for bacterial culture
71.3128	1	0	0	0	0	0	0	0	0	0	0	0	0	36.5	0	107	0	10.64	0	0	0	1	1	0	1	0	0	0	1	13	2	0	2	14	29	0	0	0	0	0	0	Escherichia coli	Bile was not sent for bacterial culture
61.8042	0	0	0	0	0	0	1	2	0	0	1	1	0	37.4	0	97.6667	0	14.77	0	1	0	1	0	0	1	0	0	0	0	13	0	1	1	13	15	0	0	0	0	0	0	No Growth	Bile was not sent for bacterial culture
39.822	0	0	0	0	0	0	0	0	0	0	0	3	1	36.8	0	93.3333	0	3.83	0	0	0	1	0	0	1	0	0	1	0	13	2	0	2	12	9	0	0	0	0	0	0	Bile was not sent for bacterial culture	Bile was not sent for bacterial culture
81.9192	1	1	0	0	0	0	0	2	0	0	0	6	1	37.8	0	93	0	15.05	0	1	0	1	0	0	0	1	0	1	0	14	2	2	5	15	8	0	0	0	0	0	0	Bile was not sent for bacterial culture	Bile was not sent for bacterial culture
77.2211	0	0	0	0	0	0	0	0	0	0	1	1	0	36.6	0	57.3333	1	8.63	0	0	0	1	0	0	0	0	1	0	0	10	1	0	0	12	9	0	0	0	0	0	0	Bile was not sent for bacterial culture	Bile was not sent for bacterial culture
86.8665	0	0	0	0	1	0	0	1	0	0	0	0	0	38.1	1	87.3333	0	11.66	0	0	0	1	1	0	1	0	0	1	0	16	2	0	2	21	32	0	0	0	0	0	0	Bile was not sent for bacterial culture	Bile was not sent for bacterial culture
70.0205	1	1	0	0	0	0	0	1	0	0	1	3	1	36.7	0	127.667	0	4.2	0	0	0	1	1	0	1	0	0	1	0	17	4	0	2	17	15	0	0	0	0	1	0	Bile was not sent for bacterial culture	Bile was not sent for bacterial culture
42.5051	1	0	0	0	0	0	0	0	0	0	1	6	1	37.1	0	117.333	0	14.45	0	0	0	1	1	0	0	1	0	0	1	6	0	1	4	9	6	0	0	0	0	0	0	No Growth	Bile was not sent for bacterial culture
36.7529	0	0	0	0	0	0	1	2	0	0	1	3	1	38.6	1	90.3333	0	5.8	0	1	0	1	0	0	1	0	0	1	0	15	0	1	2	30	8	0	0	0	0	0	0	Bile was not sent for bacterial culture	Bile was not sent for bacterial culture
46.0671	1	0	0	0	0	0	0	0	0	0	1	5	1	36.5	0	86.6667	0	1.25	0	0	0	1	1	0	0	1	0	1	0	11	0	2	2	13	19	0	1	0	0	1	0	Bile was not sent for bacterial culture	Bile was not sent for bacterial culture
72.7118	0	0	0	0	0	0	0	0	0	0	0	5	1	39.2	1	86.3333	0	13.3	0	1	0	1	1	0	0	1	0	1	0	15	0	2	5	23	14	0	0	0	0	0	0	Bile was not sent for bacterial culture	Bile was not sent for bacterial culture
62.1958	0	0	0	0	0	0	0	1	0	0	1	4	1	37.4	0	47	1	16.16	0	0	0	1	1	0	0	1	0	1	0	10	3	1	1	13	17	0	1	0	0	1	0	Bile was not sent for bacterial culture	Bile was not sent for bacterial culture
28.7912	1	0	0	0	0	0	0	0	0	0	1	1	0	36.9	0	110.333	0	13.33	0	0	0	1	0	0	1	0	0	1	0	8	3	0	5	10	13	0	1	0	0	1	0	Enterococcus faecium	Bile was not sent for bacterial culture
51.989	1	0	0	0	0	0	0	0	0	0	0	0	0	36.4	0	112	0	10.17	0	0	0	1	1	0	1	0	0	0	1	12	2	0	2	15	13	0	0	0	0	0	0	Bile was not sent for bacterial culture	Bile was not sent for bacterial culture
87.0089	1	0	1	0	0	0	0	1	0	0	1	2	0	38	1	102	0	13.18	0	1	1	1	1	0	1	0	0	1	0	12	0	0	4	12	6	0	0	0	0	0	0	Bile was not sent for bacterial culture	Bile was not sent for bacterial culture
92.9363	1	0	0	0	0	0	0	0	0	0	1	3	1	37	0	98.3333	0	16.47	0	0	1	0	0	1	0	1	0	1	0	16	0	0	4	16	7	0	0	0	0	0	0	Bile was not sent for bacterial culture	Bile was not sent for bacterial culture
84.9008	1	0	0	0	0	0	0	1	0	0	1	1	0	36.5	0	89.3333	0	11.04	0	0	0	1	1	0	1	0	0	1	0	13	2	2	4	17	13	0	1	0	0	1	0	Bile was not sent for bacterial culture	Bile was not sent for bacterial culture
85.2348	0	1	1	0	0	0	0	3	0	0	0	0	0	37.1	0	98.3333	0	10.6	0	0	0	1	1	1	0	1	0	0	1	13	4	0	0	17	4	0	0	0	0	0	0	Bile was not sent for bacterial culture	Bile was not sent for bacterial culture
